# Supplementary material for: Impacts of Supplementation with Silymarin on Cardiovascular Risk Factors: A Systematic Review and Dose–Response Meta-Analysis
Source: MDPI journal article supplement (doi:10.3390/antiox13040390), 2024-03-24
Supplement: s1 [file s1]

Supplementary Materials

Supplementary Table S1. Risk of bias assessment for included trials in the meta-analysis.

| Study                          | Bias arising from the randomization process (Allocation bias) | Bias due to deviations from the intended interventions (Performance bias) | Bias due to missing outcome data (Attrition bias) | Bias in the measurement of the Outcome (Detection bias) | Bias in the selection of reported results (Reporting bias) | The overall risk of bias |
|--------------------------------|---------------------------------------------------------------|---------------------------------------------------------------------------|---------------------------------------------------|---------------------------------------------------------|------------------------------------------------------------|--------------------------|
| Velussi et al. 1993            | H                                                             | U                                                                         | L                                                 | L                                                       | U                                                          | H                        |
| Velussi et al. 1997            | H                                                             | U                                                                         | L                                                 | L                                                       | U                                                          | H                        |
| Simanek et al. 2001            | U                                                             | L                                                                         | L                                                 | L                                                       | L                                                          | U                        |
| Fallah Huseini et al. 2004     | L                                                             | L                                                                         | L                                                 | L                                                       | U                                                          | U                        |
| Fallah Huseini et al. 2006     | L                                                             | L                                                                         | L                                                 | L                                                       | U                                                          | U                        |
| Hussain et al. 2007            | U                                                             | L                                                                         | L                                                 | L                                                       | U                                                          | H                        |
| Valentova et al. 2008          | H                                                             | U                                                                         | L                                                 | L                                                       | U                                                          | H                        |
| Ramezani et al. 2008           | L                                                             | L                                                                         | L                                                 | L                                                       | L                                                          | L                        |
| Hajaghamohammadi et al. 2008   | U                                                             | U                                                                         | L                                                 | L                                                       | U                                                          | H                        |
| Gharagozloo et al. 2009        | U                                                             | L                                                                         | L                                                 | L                                                       | H                                                          | H                        |
| Hashemi et al. 2009            | U                                                             | U                                                                         | L                                                 | L                                                       | U                                                          | H                        |
| Numan et al. 2010              | U                                                             | L                                                                         | L                                                 | L                                                       | U                                                          | H                        |
| Rezvanian et al. 2011          | U                                                             | L                                                                         | L                                                 | L                                                       | U                                                          | H                        |
| Fallahzadeh et al.2012         | L                                                             | L                                                                         | L                                                 | L                                                       | L                                                          | L                        |
| Alkuraishy et al. 2012         | H                                                             | U                                                                         | L                                                 | L                                                       | U                                                          | H                        |
| Mohammadi et al. 2013          | H                                                             | U                                                                         | L                                                 | L                                                       | U                                                          | H                        |
| Di Pierro et al. 2013          | H                                                             | U                                                                         | L                                                 | L                                                       | U                                                          | H                        |
| Taghvaei et al. 2013           | L                                                             | L                                                                         | L                                                 | L                                                       | L                                                          | L                        |
| Masoodi et al. 2013            | U                                                             | L                                                                         | L                                                 | L                                                       | U                                                          | H                        |
| Ebrahimpourkoujan et al. 2015  | L                                                             | L                                                                         | L                                                 | L                                                       | L                                                          | L                        |
| Elgarf et al. 2015             | H                                                             | U                                                                         | L                                                 | L                                                       | U                                                          | H                        |
| Shirali et al. 2016            | H                                                             | U                                                                         | L                                                 | L                                                       | U                                                          | H                        |
| Shirali et al. 2016            | H                                                             | U                                                                         | L                                                 | L                                                       | U                                                          | H                        |
| Kheong et al. 2017             | L                                                             | L                                                                         | L                                                 | L                                                       | L                                                          | L                        |
| Ebrahimpour-koujan et al. 2018 | L                                                             | L                                                                         | L                                                 | L                                                       | L                                                          | L                        |
| Anushiravani et al. 2019       | L                                                             | L                                                                         | L                                                 | L                                                       | L                                                          | L                        |
| Ghalandari et al. 2020         | H                                                             | U                                                                         | L                                                 | L                                                       | U                                                          | H                        |
| Vidimce et al. 2021            | H                                                             | U                                                                         | L                                                 | L                                                       | U                                                          | H                        |
| Shadmehri et al. 2021          | H                                                             | U                                                                         | L                                                 | L                                                       | U                                                          | H                        |
| Momon et al. 2021              | H                                                             | U                                                                         | L                                                 | L                                                       | U                                                          | H                        |
| Aryan et al. 2022              | L                                                             | L                                                                         | L                                                 | L                                                       | U                                                          | U                        |
| Mirhashemi et al.2022          | U                                                             | L                                                                         | L                                                 | L                                                       | U                                                          | H                        |
| Khan et al. 2022               | H                                                             | U                                                                         | L                                                 | L                                                       | U                                                          | H                        |

Abbreviations: L, low risk of bias, H, high risk of bias; U, unclear risk of bias.

**Supplementary Table S2.** GRADE profile of the impacts of silymarin supplementation on cardiovascular risk factors

| Outcomes        | Risk of bias            | Inconsistency                        | Indirectness          | Imprecision                     | Publication Bias                | Quality of evidence |
|-----------------|-------------------------|--------------------------------------|-----------------------|---------------------------------|---------------------------------|---------------------|
| Body weight     | Very serious limitation | No serious limitation                | No serious limitation | Serious limitation <sup>2</sup> | No serious limitation           | ⊕○○○<br>Very low    |
| BMI             | Very serious limitation | Very serious limitation <sup>1</sup> | No serious limitation | Serious limitation <sup>2</sup> | serious limitation <sup>3</sup> | ⊕○○○<br>Very low    |
| FBG             | Very serious limitation | Very serious limitation <sup>1</sup> | No serious limitation | No serious limitation           | serious limitation <sup>3</sup> | ⊕○○○<br>Very low    |
| Fasting insulin | Very serious limitation | Very serious limitation <sup>1</sup> | No serious limitation | No serious limitation           | serious limitation <sup>3</sup> | ⊕○○○<br>Very low    |
| HbA1c           | Very serious limitation | Very serious limitation <sup>1</sup> | No serious limitation | No serious limitation           | No serious limitation           | ⊕○○○<br>Very low    |
| TG              | Very serious limitation | Very serious limitation <sup>1</sup> | No serious limitation | No serious limitation           | No serious limitation           | ⊕○○○<br>Very low    |
| TC              | Very serious limitation | Very serious limitation <sup>1</sup> | No serious limitation | No serious limitation           | No serious limitation           | ⊕○○○<br>Very low    |
| LDL             | Very serious limitation | Very serious limitation <sup>1</sup> | No serious limitation | No serious limitation           | serious limitation <sup>3</sup> | ⊕○○○<br>Very low    |
| HDL             | Very serious limitation | Very serious limitation <sup>1</sup> | No serious limitation | Serious limitation <sup>2</sup> | serious limitation <sup>3</sup> | ⊕○○○<br>Very low    |
| CRP             | Very serious limitation | Very serious limitation <sup>1</sup> | No serious limitation | Serious limitation <sup>2</sup> | No serious limitation           | ⊕○○○<br>Very low    |
| SBP             | Very serious limitation | No serious limitation                | No serious limitation | Serious limitation <sup>2</sup> | serious limitation <sup>3</sup> | ⊕○○○<br>Very low    |
| DBP             | Very serious limitation | No serious limitation                | No serious limitation | No serious limitation           | No serious limitation           | ⊕⊕○○<br>Low         |

Abbreviations: BMI, body mass index; FBG, fasting blood glucose; HbA1c, hemoglobin A1c; TG. Triglycerides; TC, total cholesterol; LDL, low-density lipoprotein; HDL, high-density lipoprotein; DBP, diastolic blood pressure; SBP, systolic blood pressure; CRP, C-reactive protein

- 1- There is significant heterogeneity.
- 2- There is no evidence of significant effects of silymarin consumption.

(A)

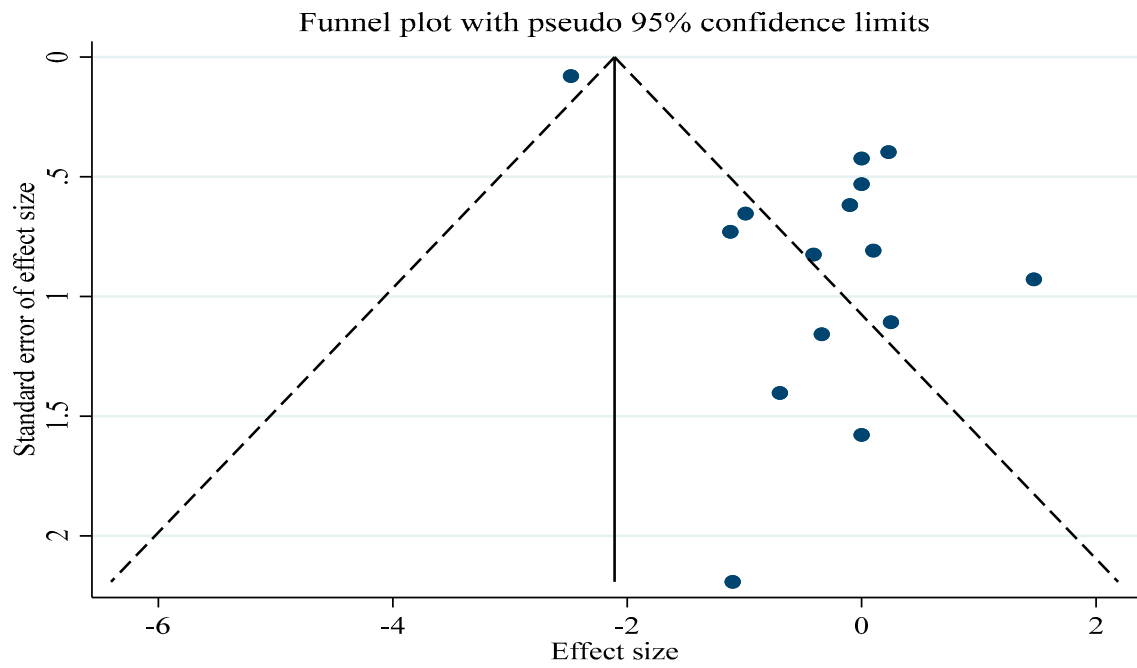

(B)

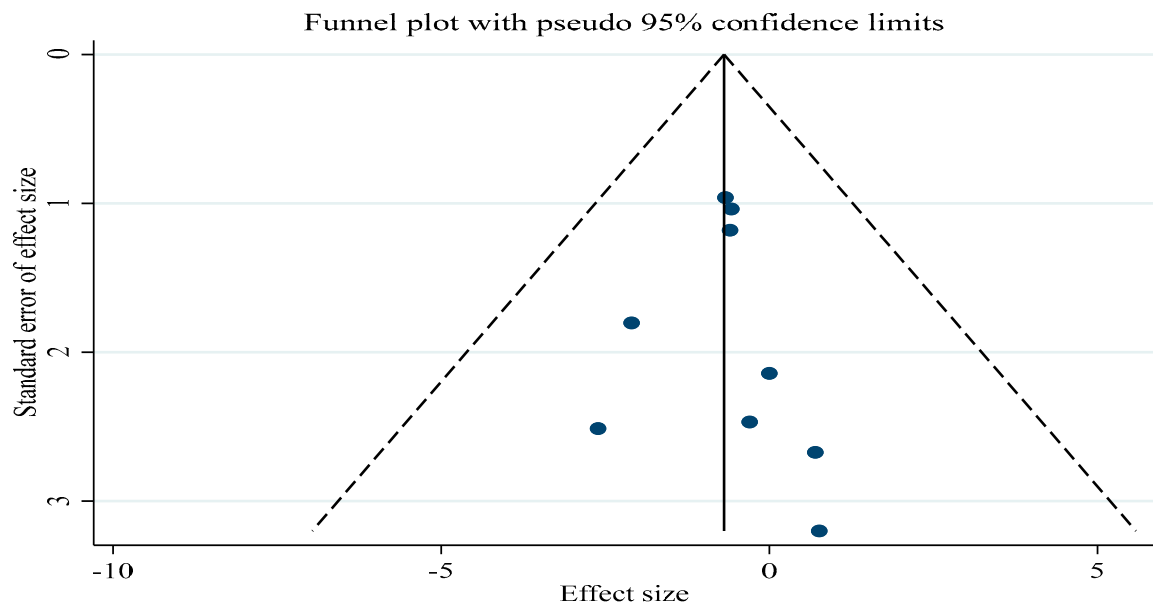

Supplementary Figure S1. *Cont.*

(C)

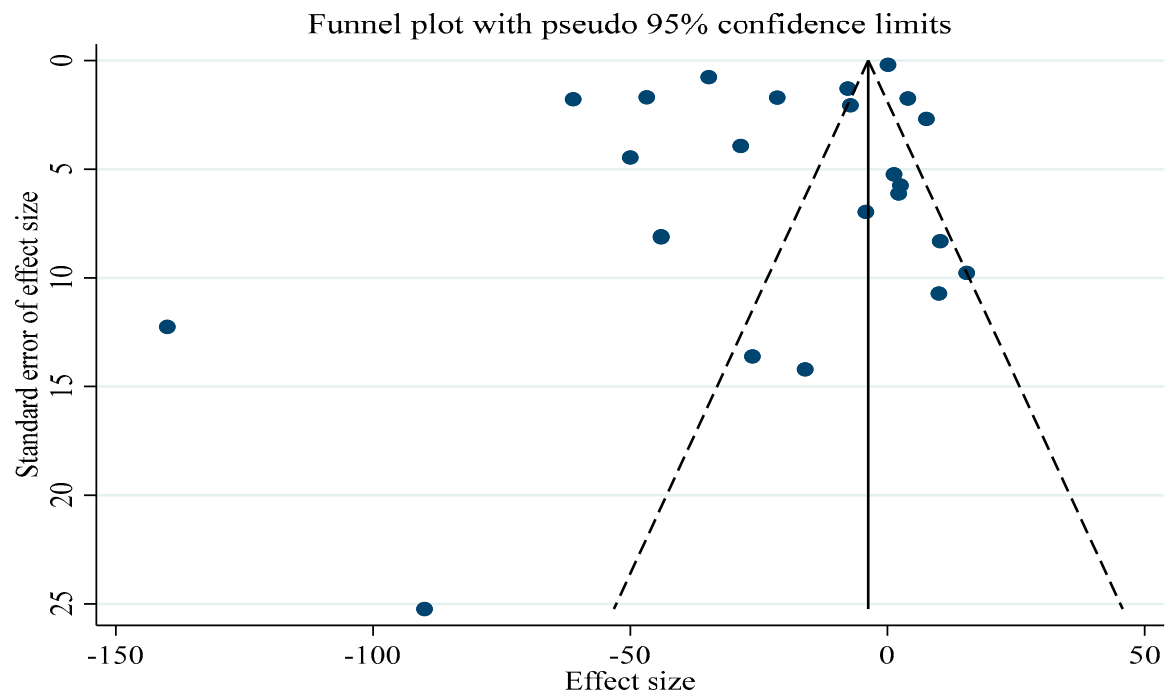

(D)

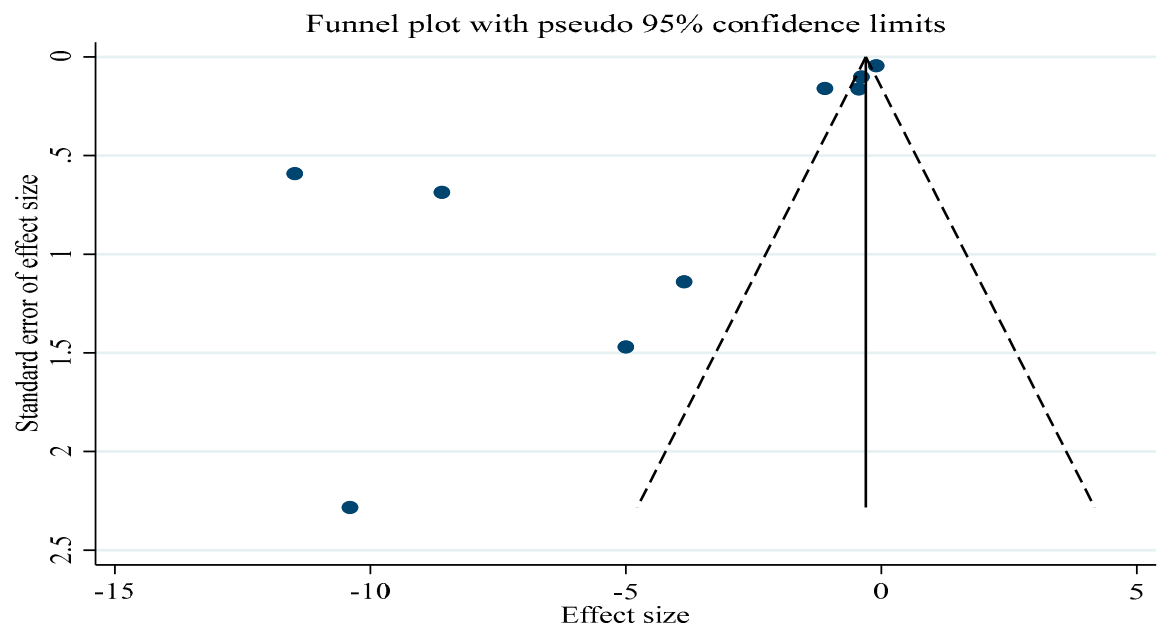

Supplementary Figure S1. *Cont.*

(E)

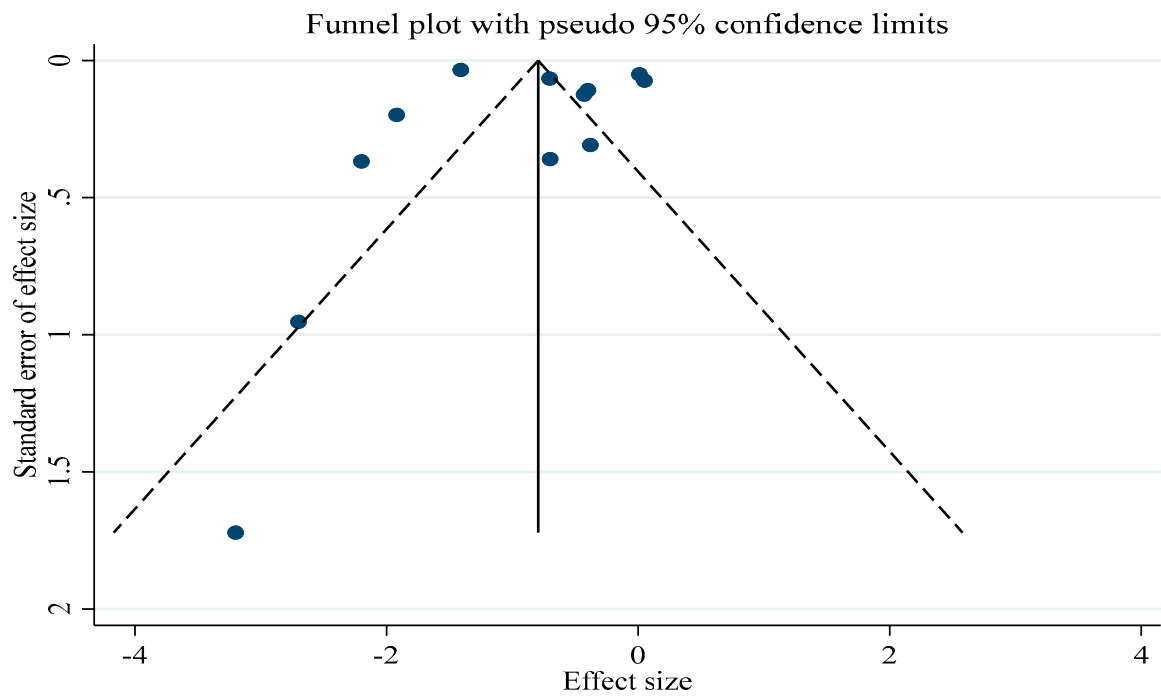

(F)

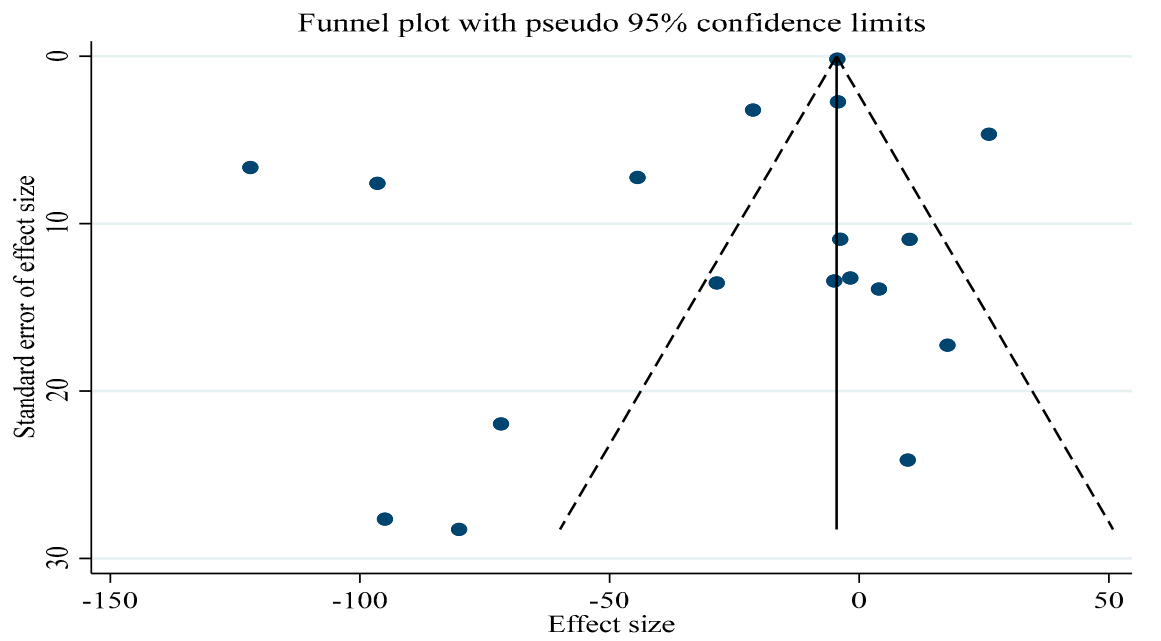

Supplementary Figure S1. *Cont.*

(G)

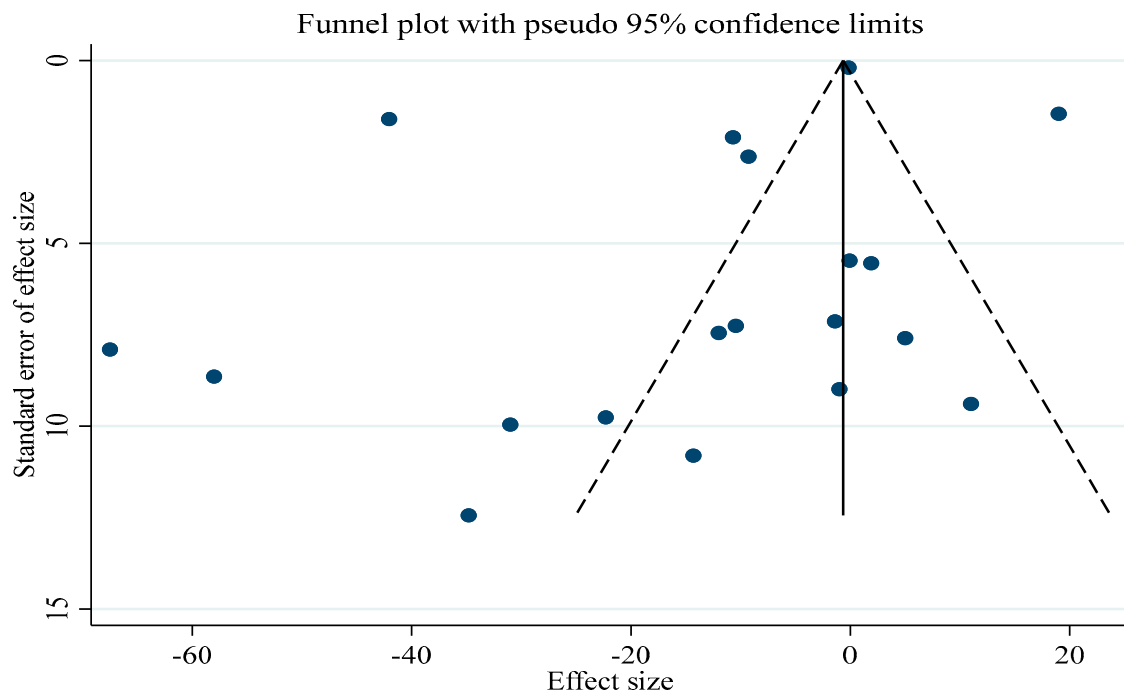

(H)

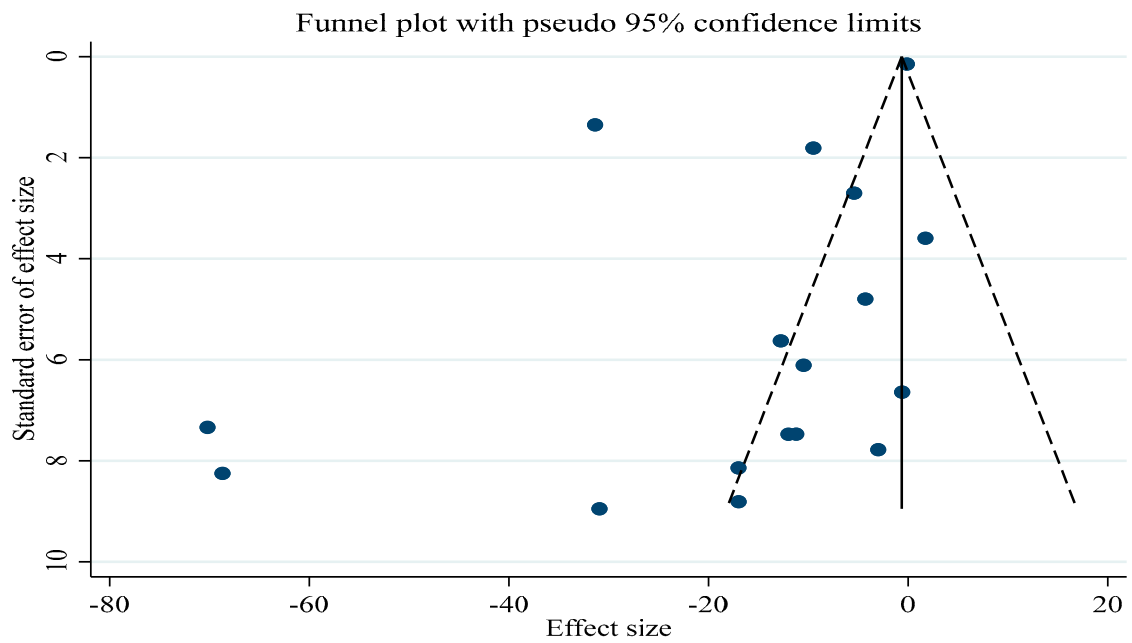

**Supplementary Figure S1. Cont.**

(I)

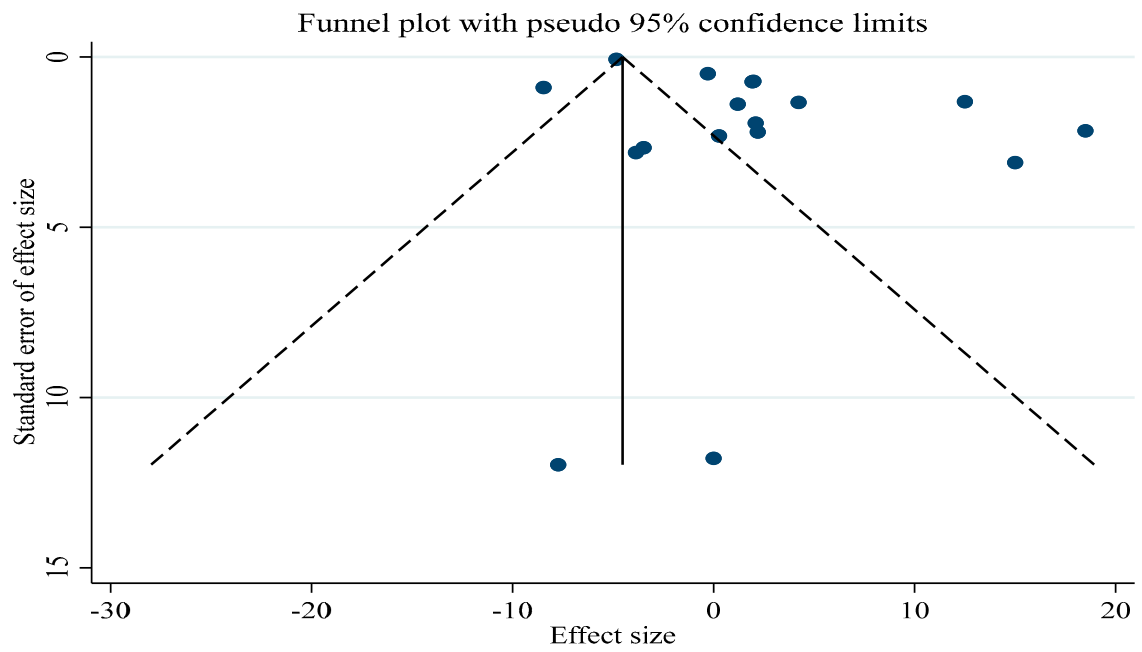

(J)

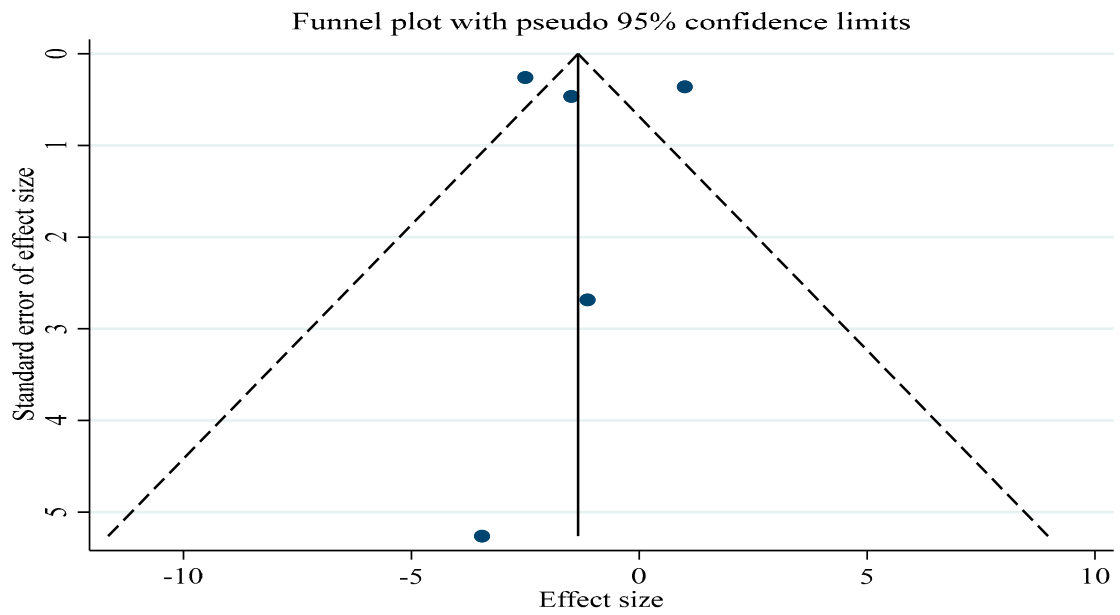

Supplementary Figure S1. *Cont.*

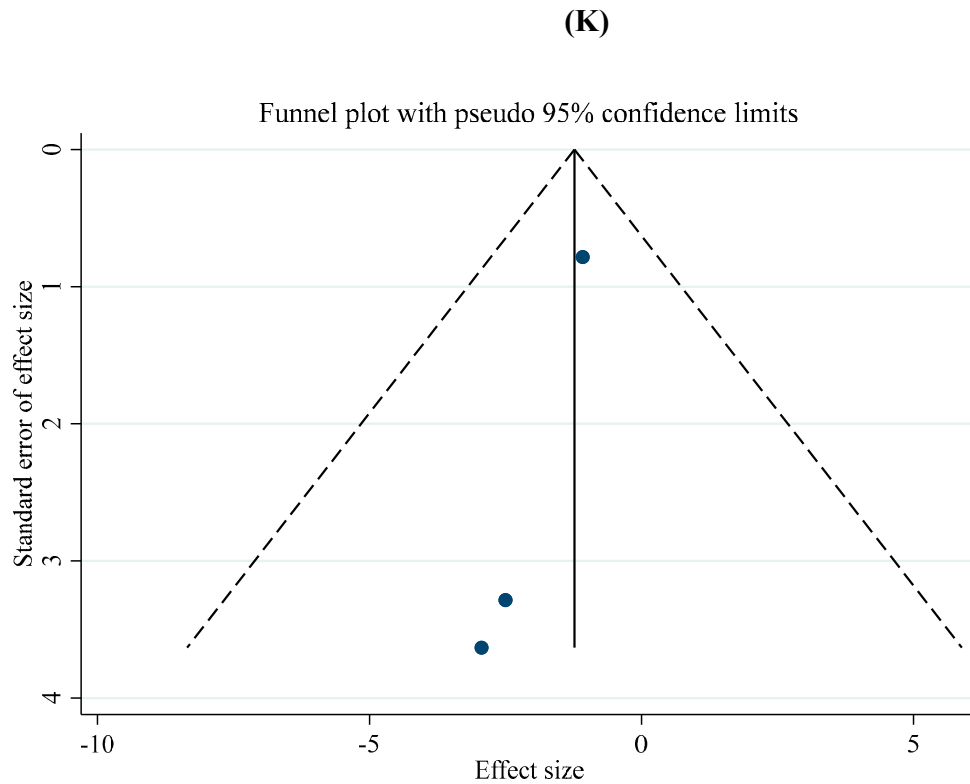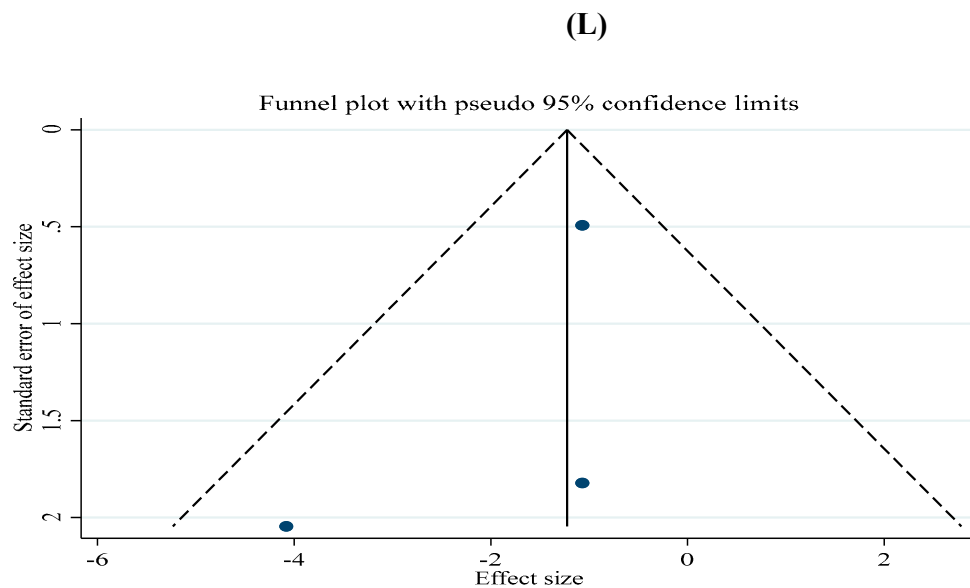

**Supplementary Figure S1.** Funnel plots for the effect of silymarin supplementation on **A)** BMI ( $\text{kg/m}^2$ ); **B)** body weight (kg); **C)** FBG (mg/dL), **D)** fasting insulin (mU/ml), **E)** HbA1c (%), **F)** TG (mg/dL), **G)** TC (mg/dL), **H)** LDL (mg/dL), **I)** HDL (mg/dL), **J)** CRP (mg/dL), **K)** SBP (mmHg), and **L)** SBP (mmHg).



(A)

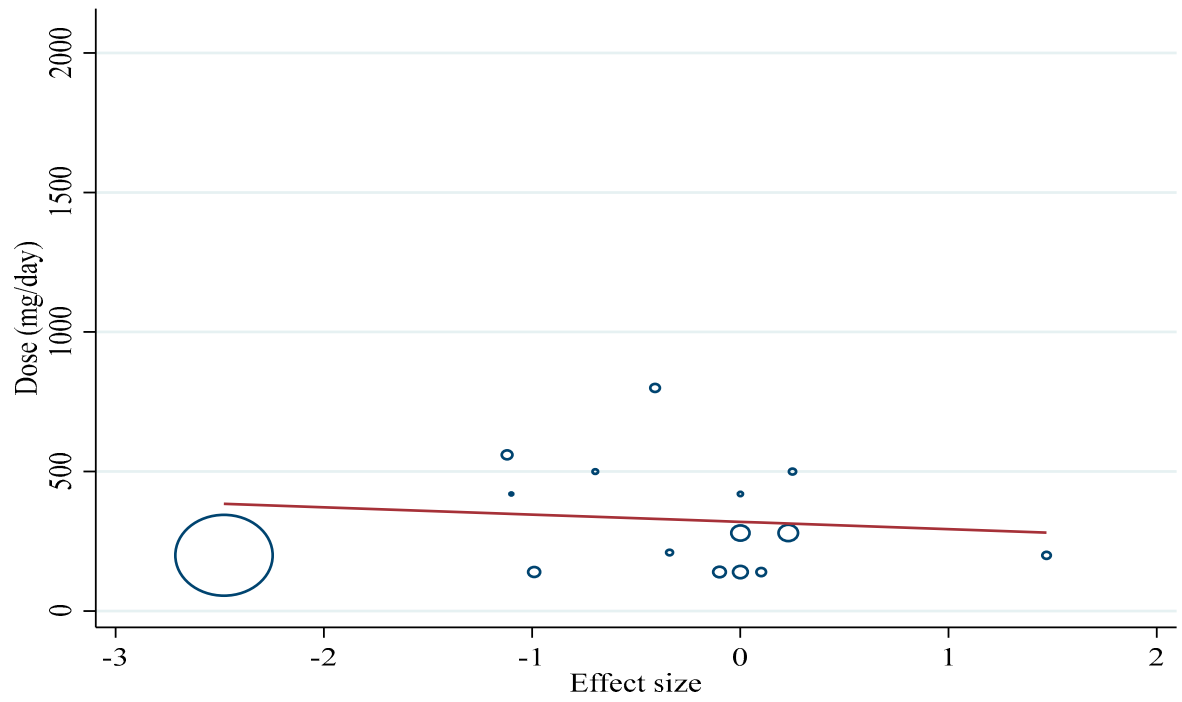

(B)

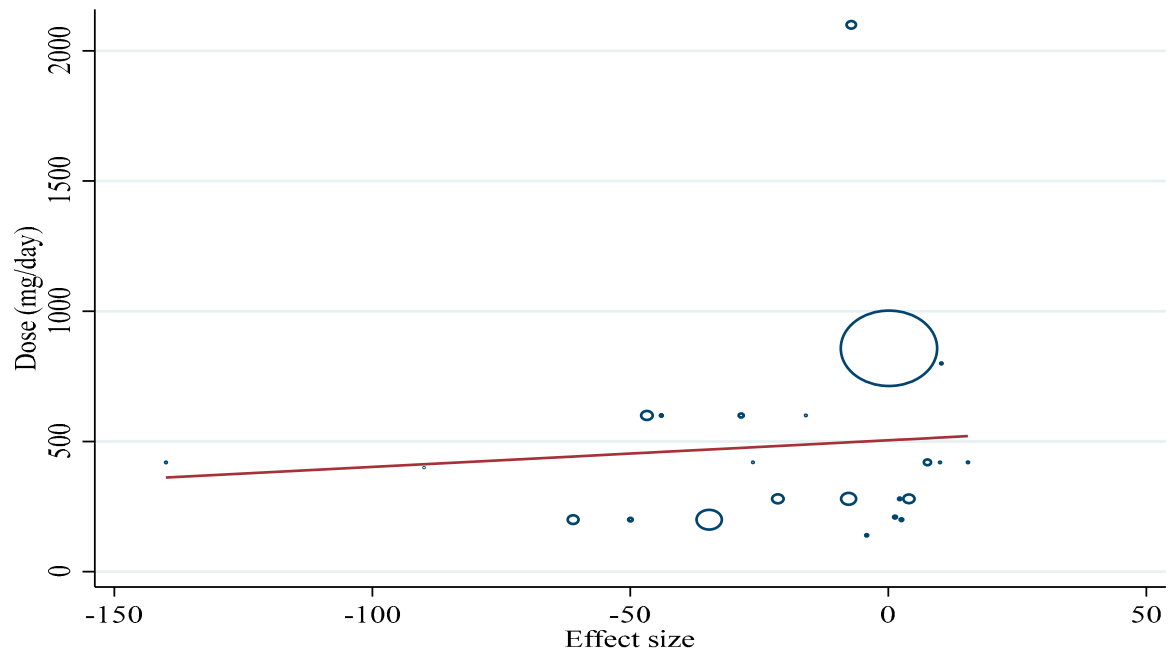

Supplementary Figure S2. *Cont.*

(C)

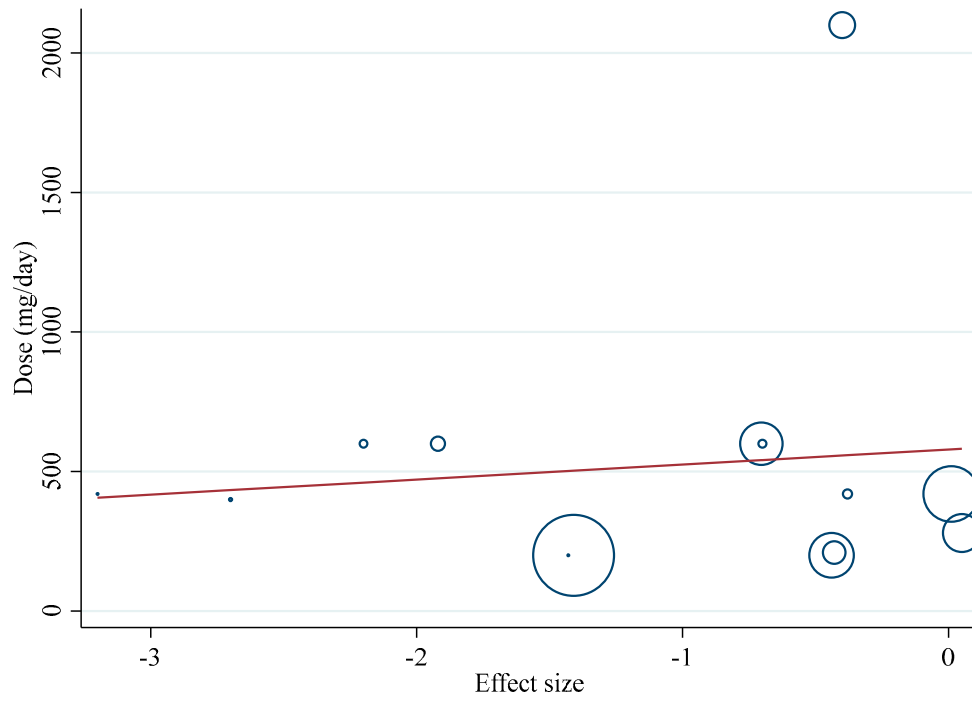

(D)

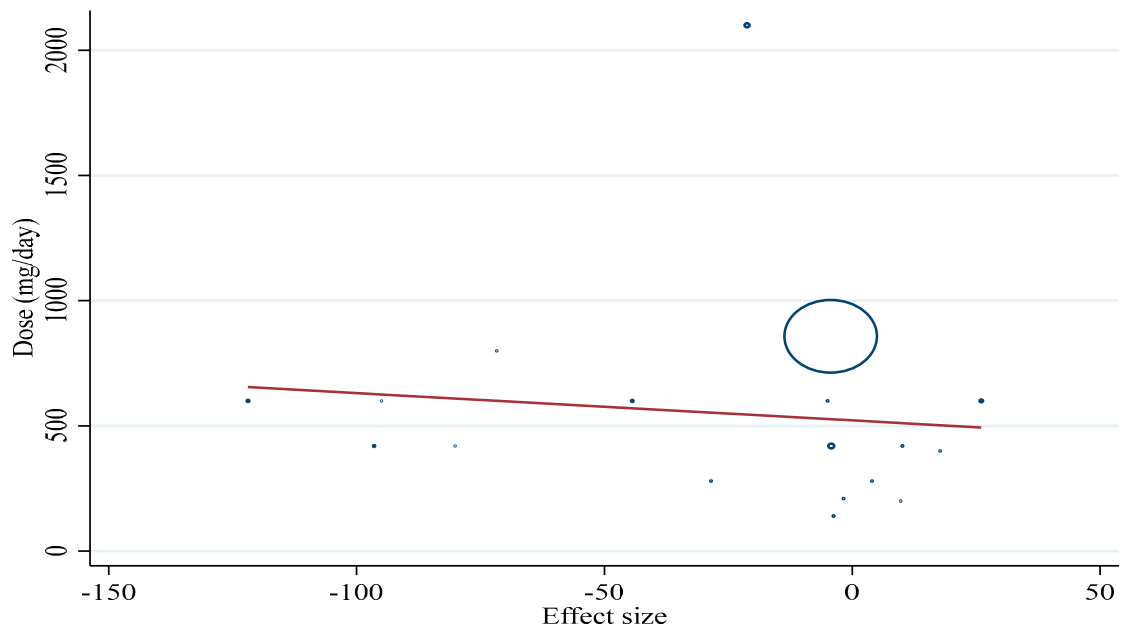

Supplementary Figure S2. *Cont.*

(E)

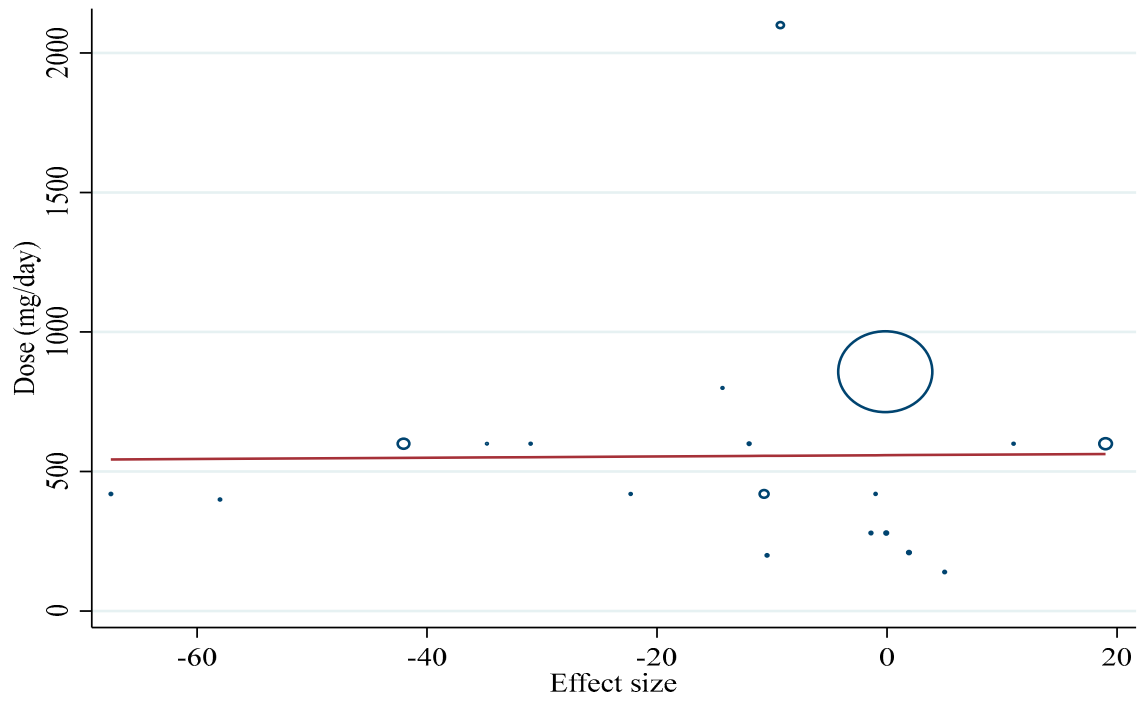

(F)

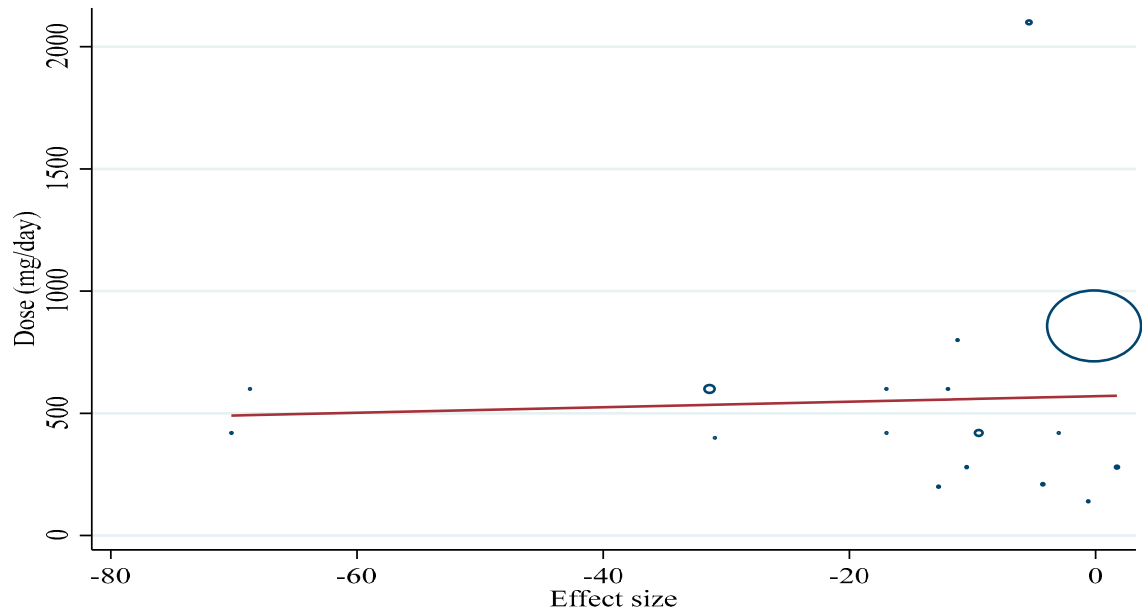

Supplementary Figure S2. *Cont.*

(G)

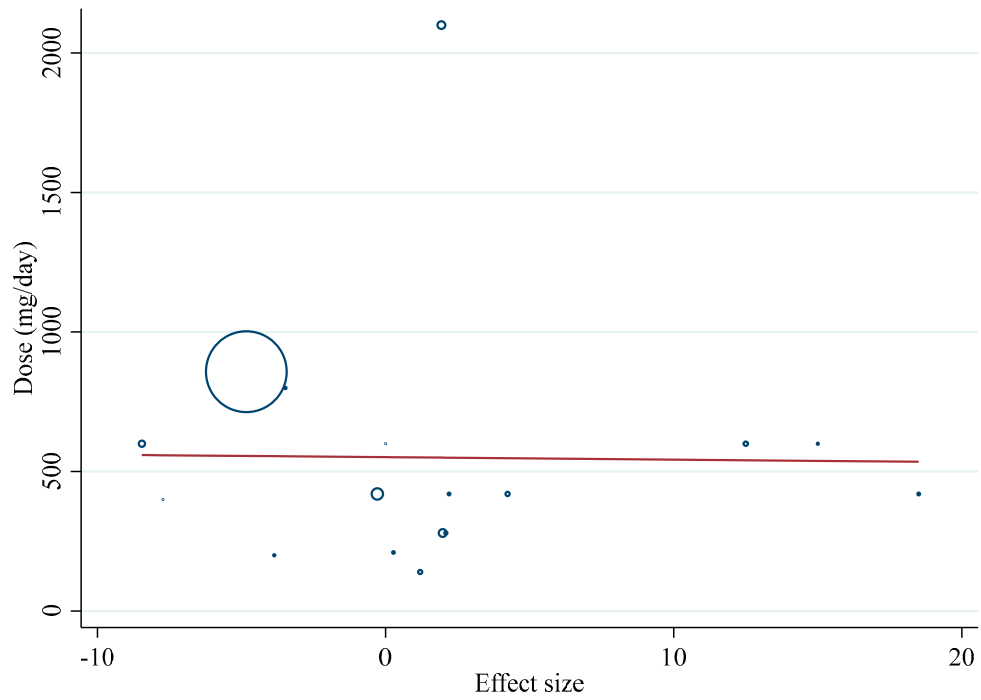

**Supplementary Figure S2.** Non-linear dose-response association between dose (mg/day) of silymarin supplementation and absolute mean differences in **A)** BMI ( $\text{kg/m}^2$ ), **B)** FBG (mg/dL), **C)** HbA1c (%), **D)** TG (mg/dL), **E)** TC (mg/dL), **F)** LDL (mg/dL), and **G)** HDL (mg/dL).

(A)

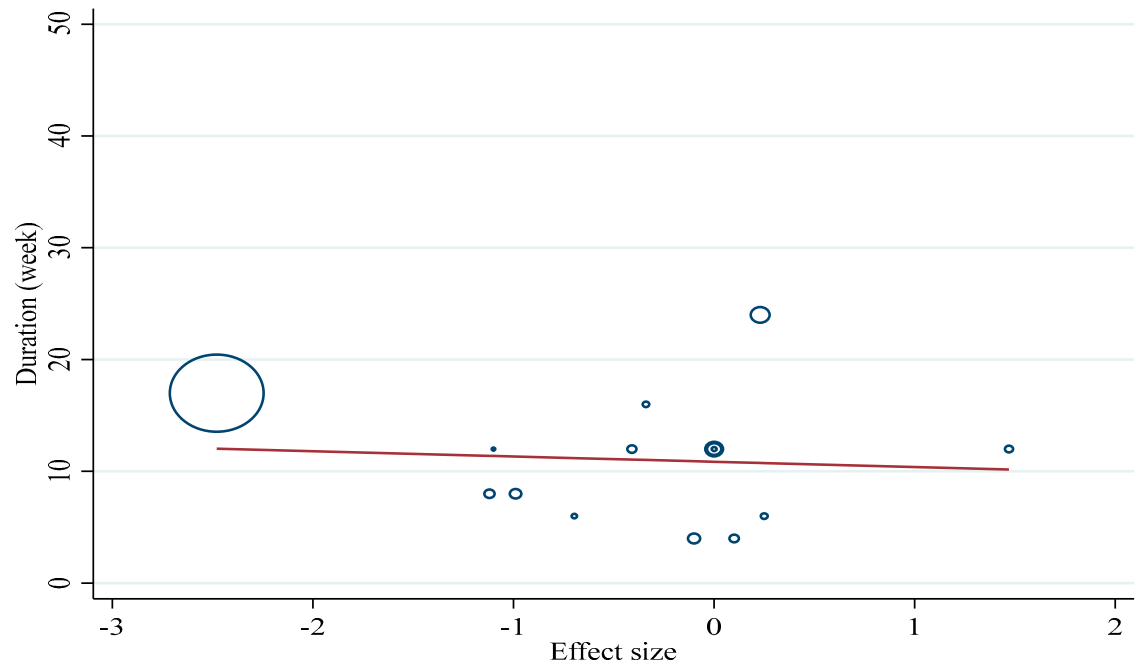

(B)

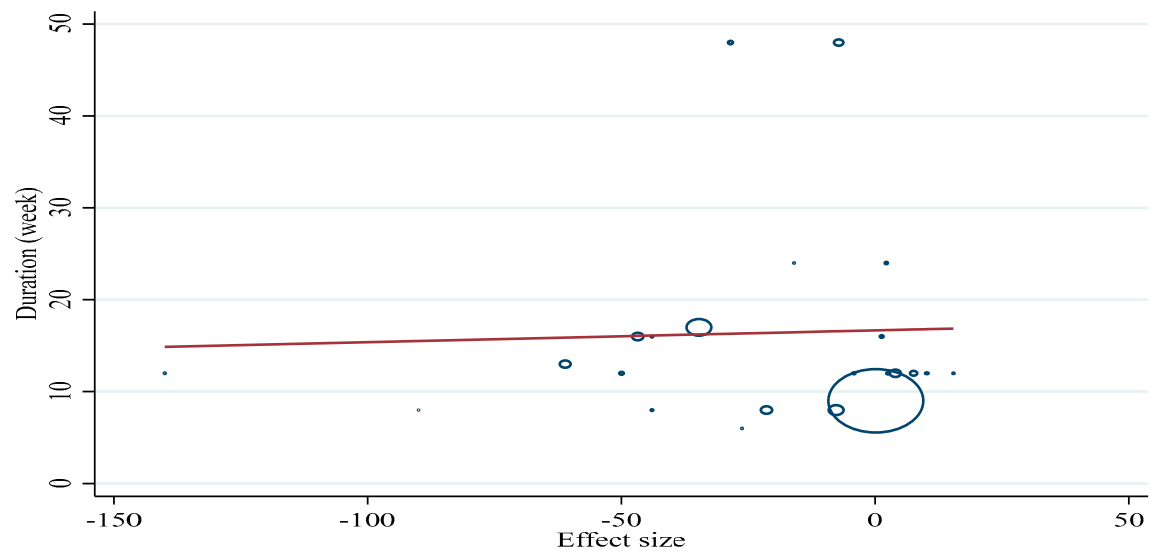

Supplementary Figure S3. *Cont.*

(C)

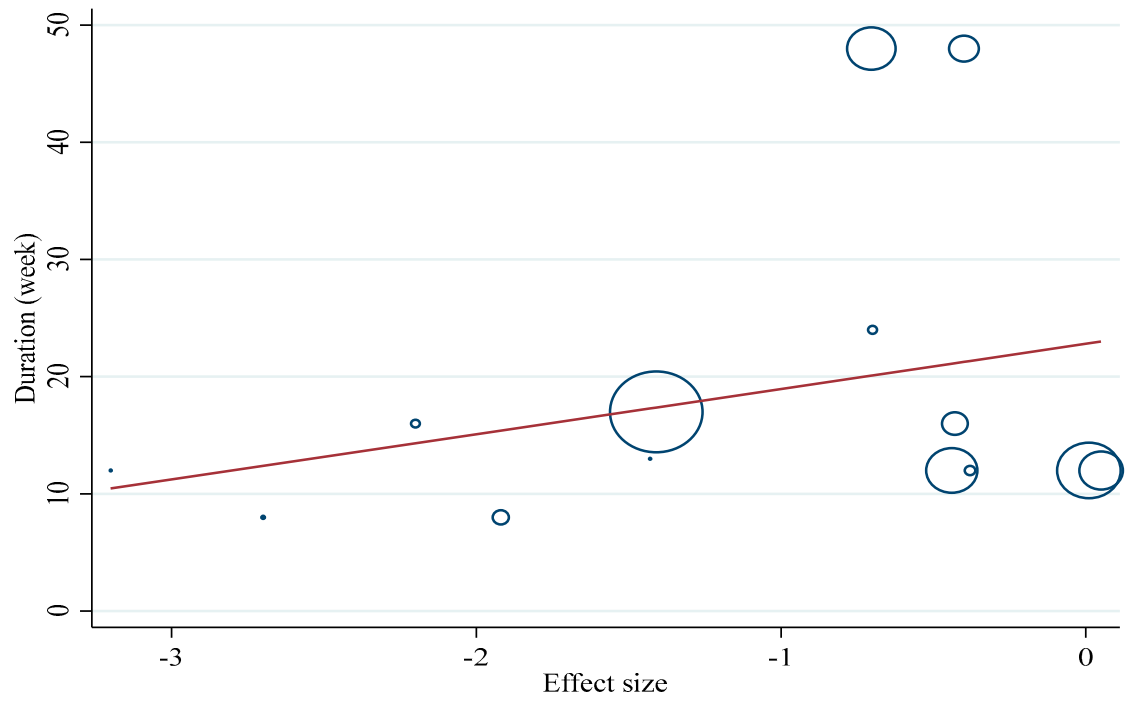

(D)

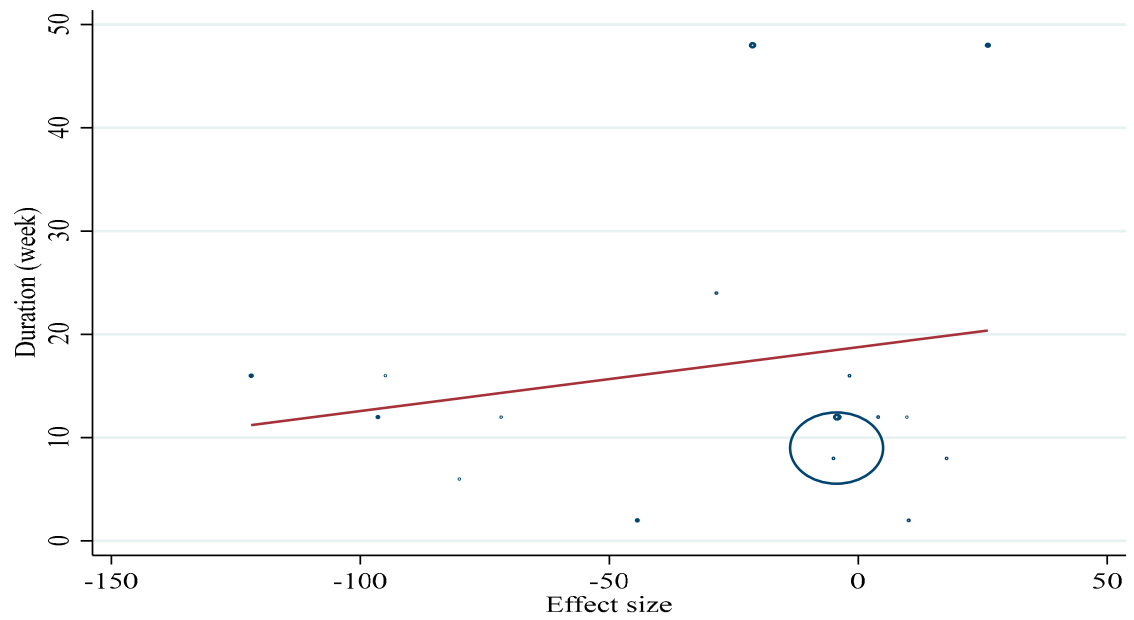

Supplementary Figure S3. *Cont.*

**(E)**

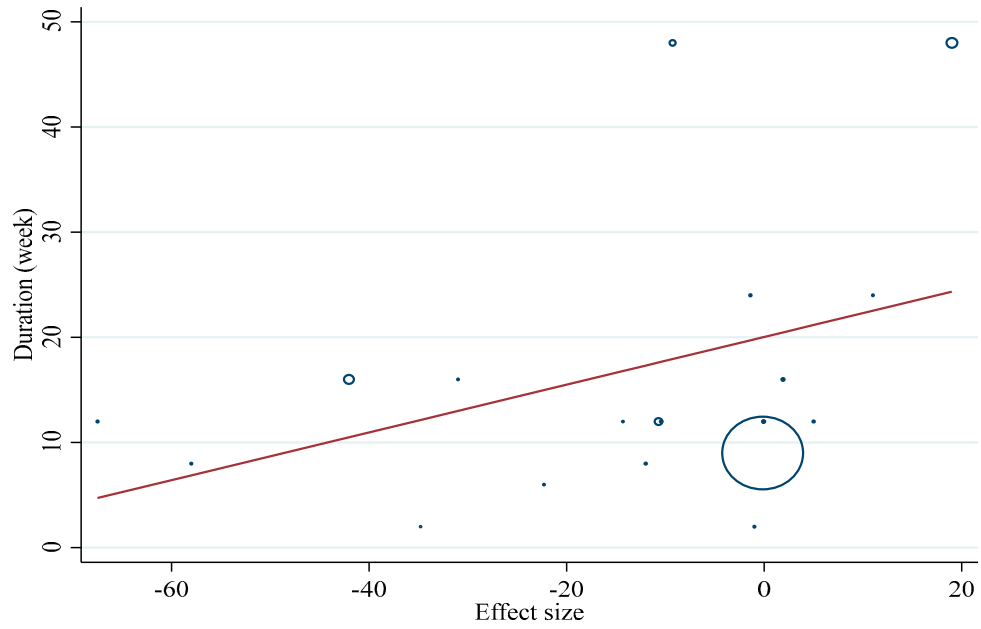

**(F)**

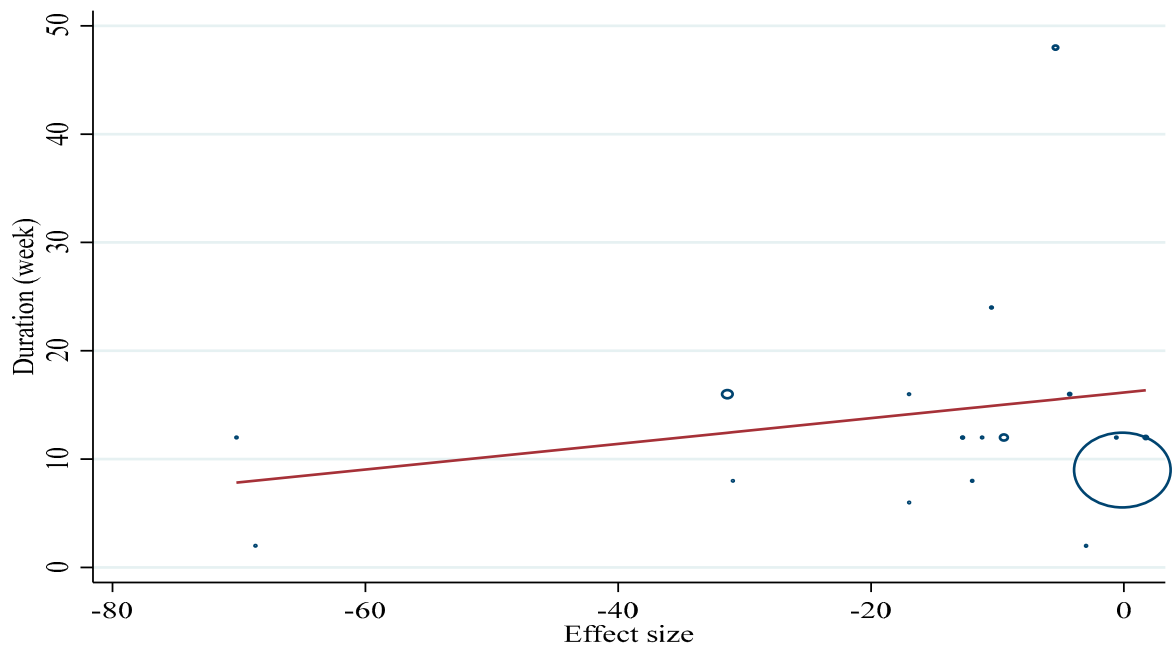

**Supplementary Figure S3. *Cont.***

(G)

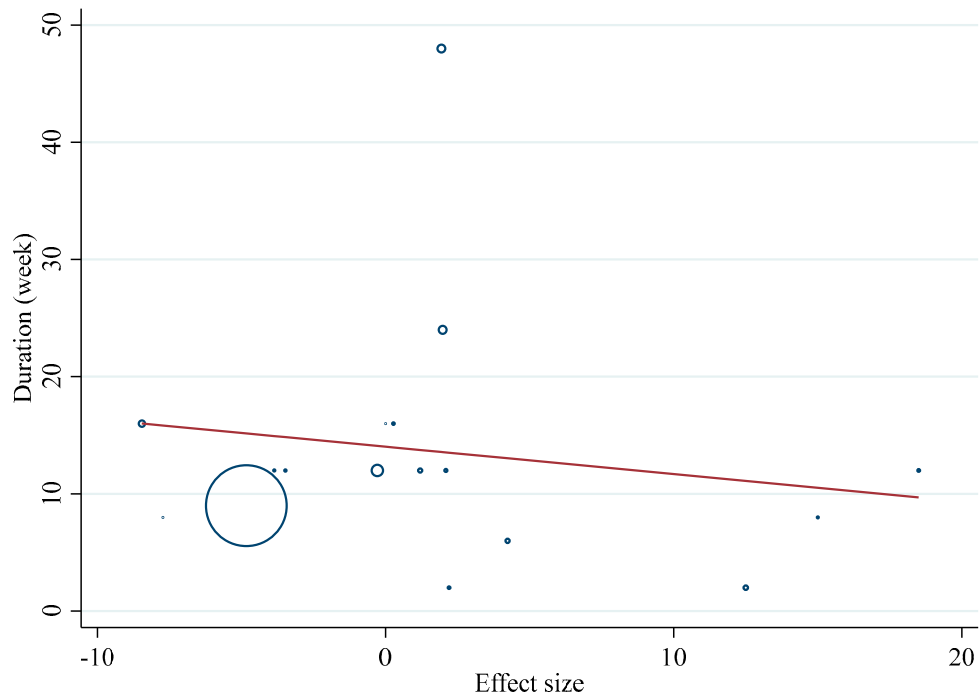

**Supplementary Figure S3.** Non-linear association between duration (week) of the supplementation with silymarin and absolute mean differences in **A)** BMI ( $\text{kg/m}^2$ ), **B)** FBG (mg/dL), **C)** HbA1c (%), **D)** TG (mg/dL), **E)** TC (mg/dL), **F)** LDL (mg/dL), and **G)** HDL (mg/dL).



(A)

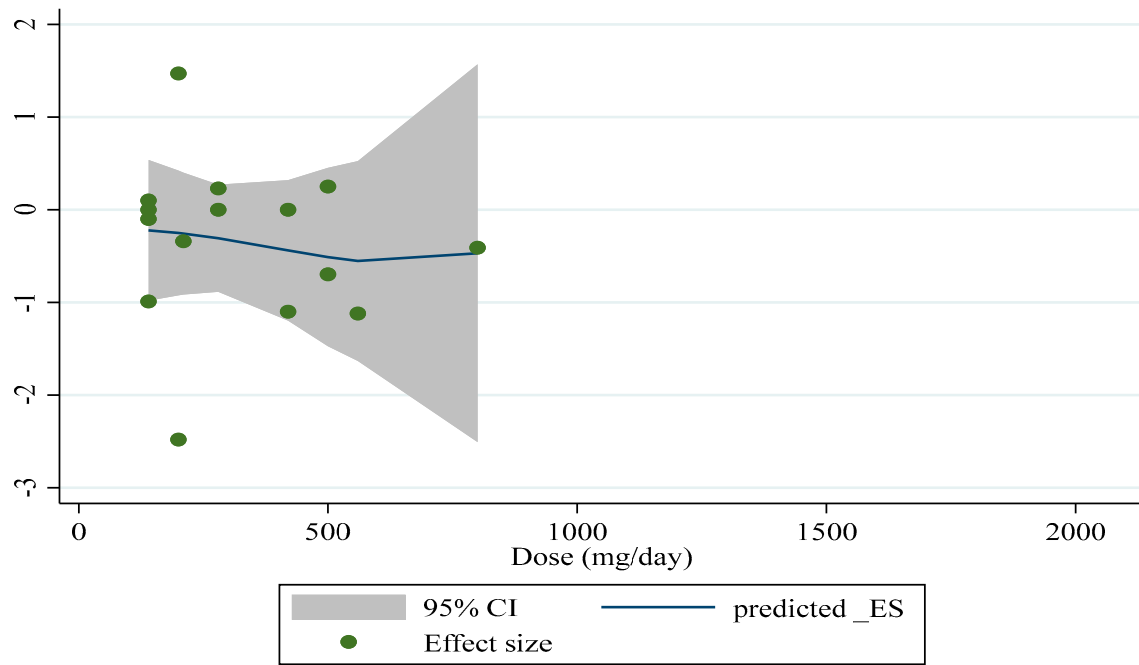

(B)

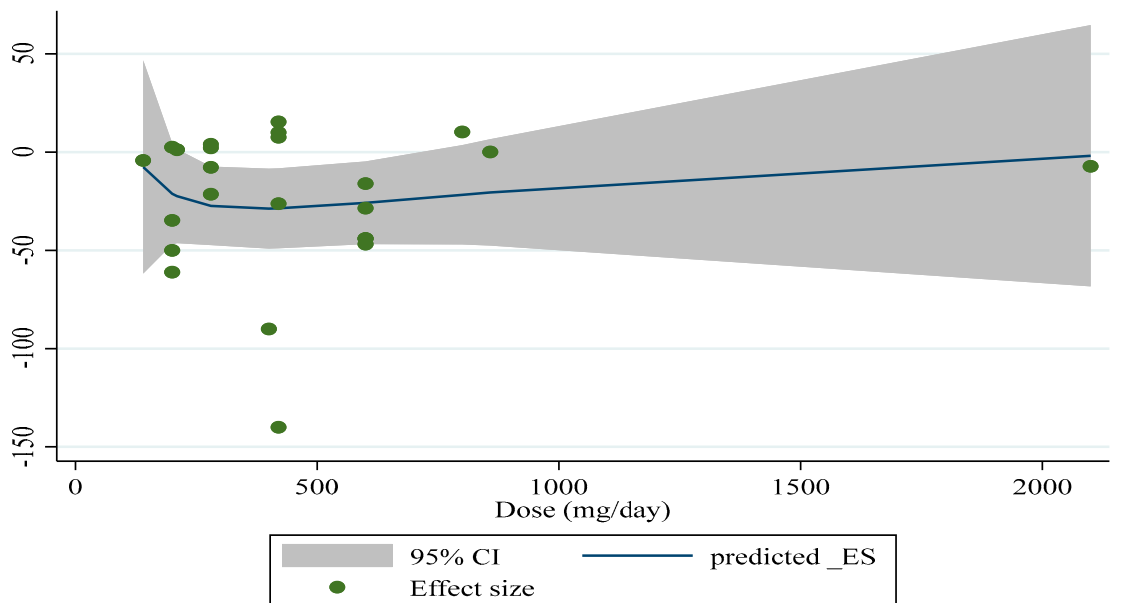

Supplementary Figure S4. *Cont.*

(C)

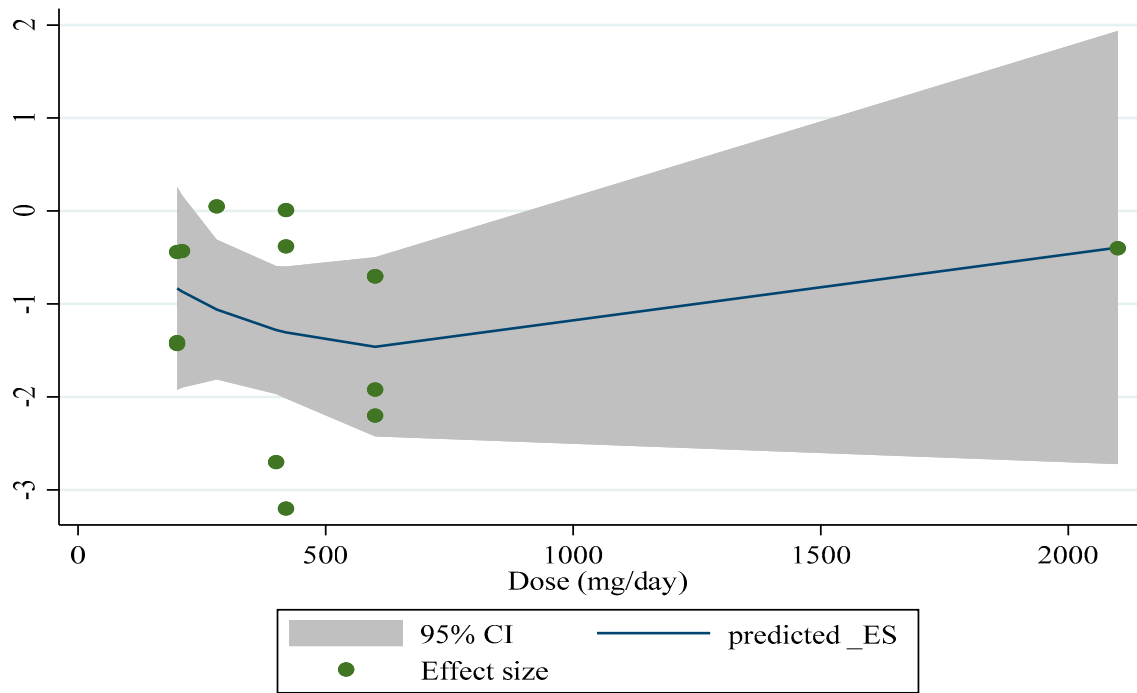

(D)

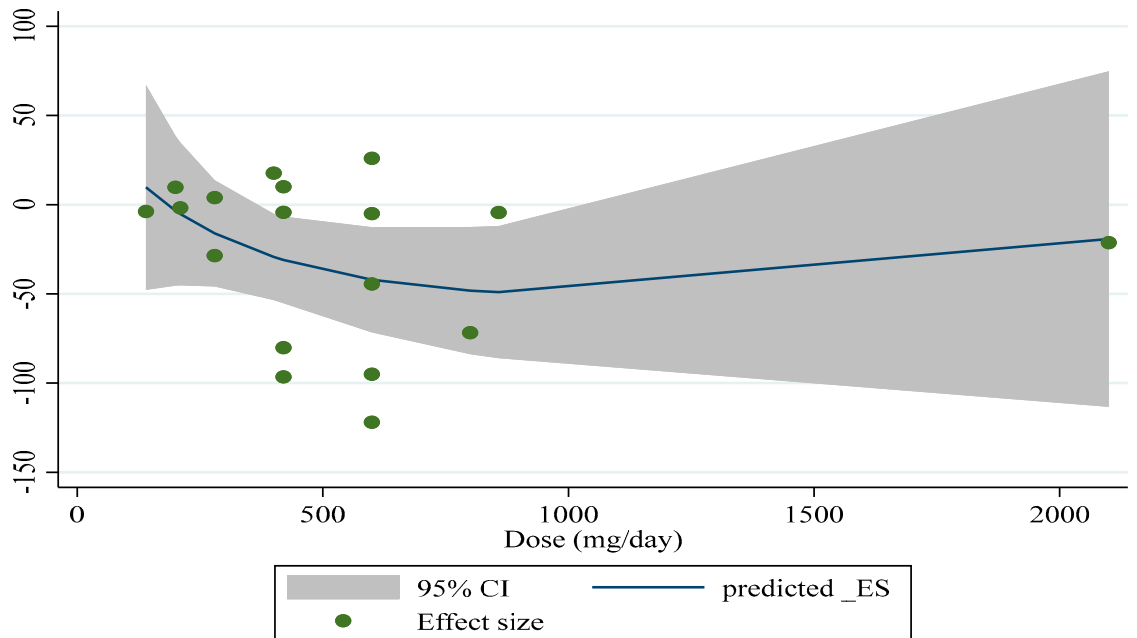

Supplementary Figure S4. *Cont.*

(E)

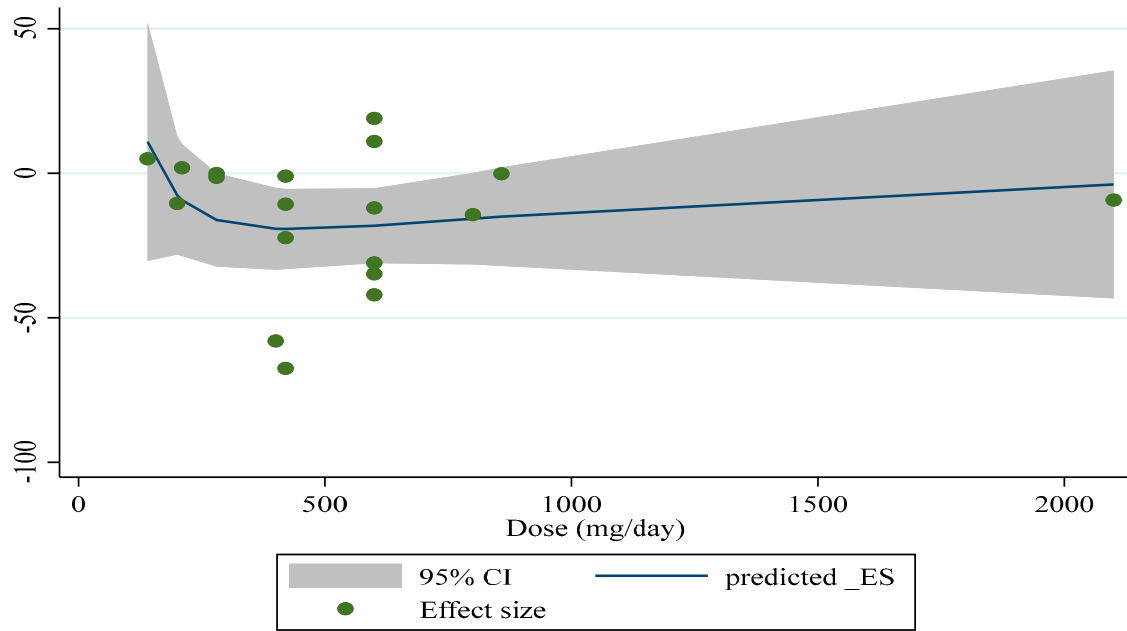

(F)

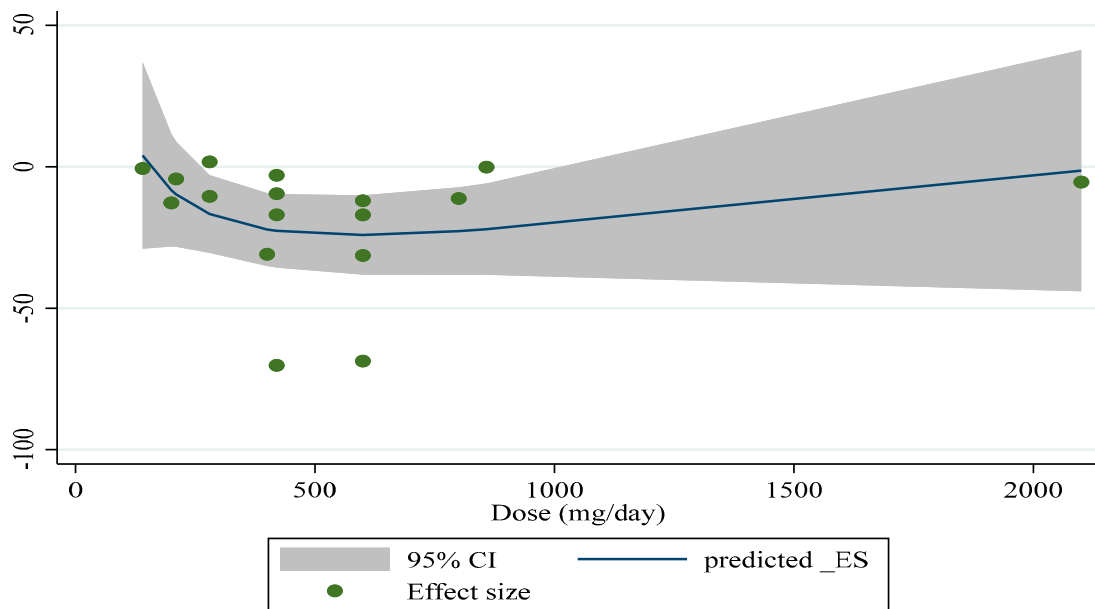

Supplementary Figure S4. *Cont.*

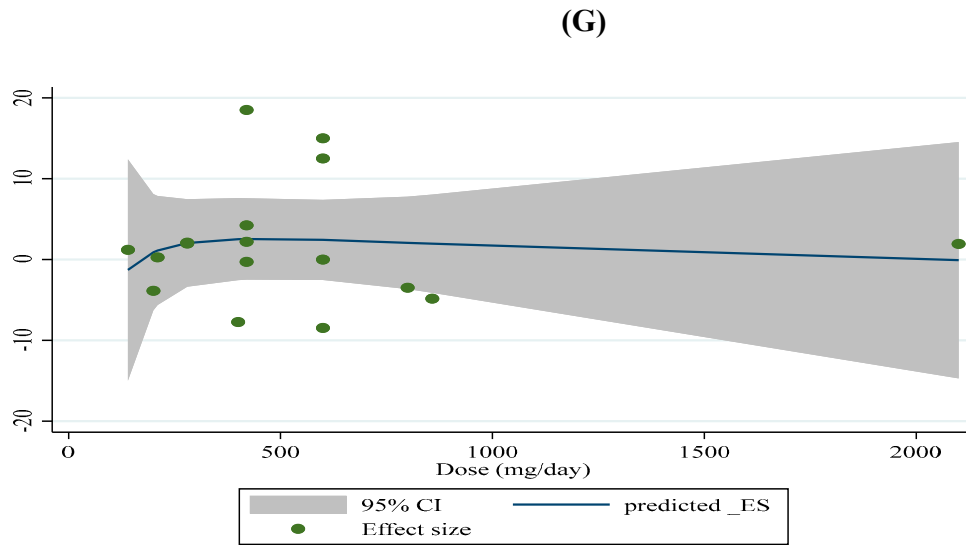

**Supplementary Figure S4.** Linear dose-response association between dose (mg/day) of silymarin supplementation and absolute mean differences in **A)** BMI ( $\text{kg/m}^2$ ), **B)** FBG (mg/dL), **C)** HbA1c (%), **D)** TG (mg/dL), **E)** TC (mg/dL), **F)** LDL (mg/dL), and **G)** HDL (mg/dL).

(A)

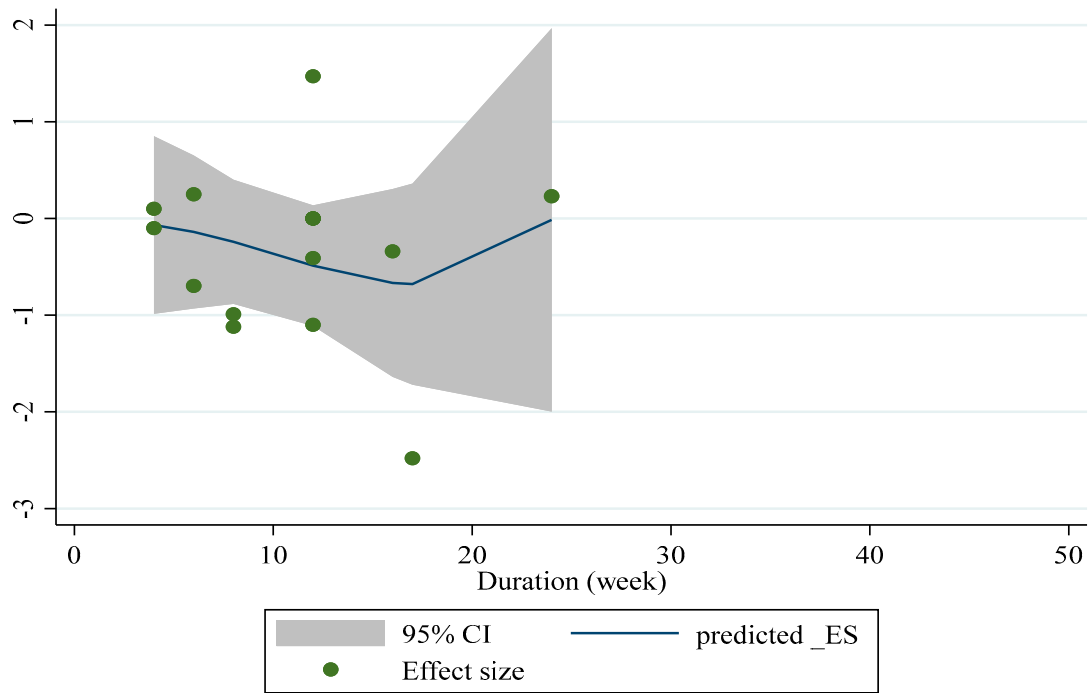

(B)

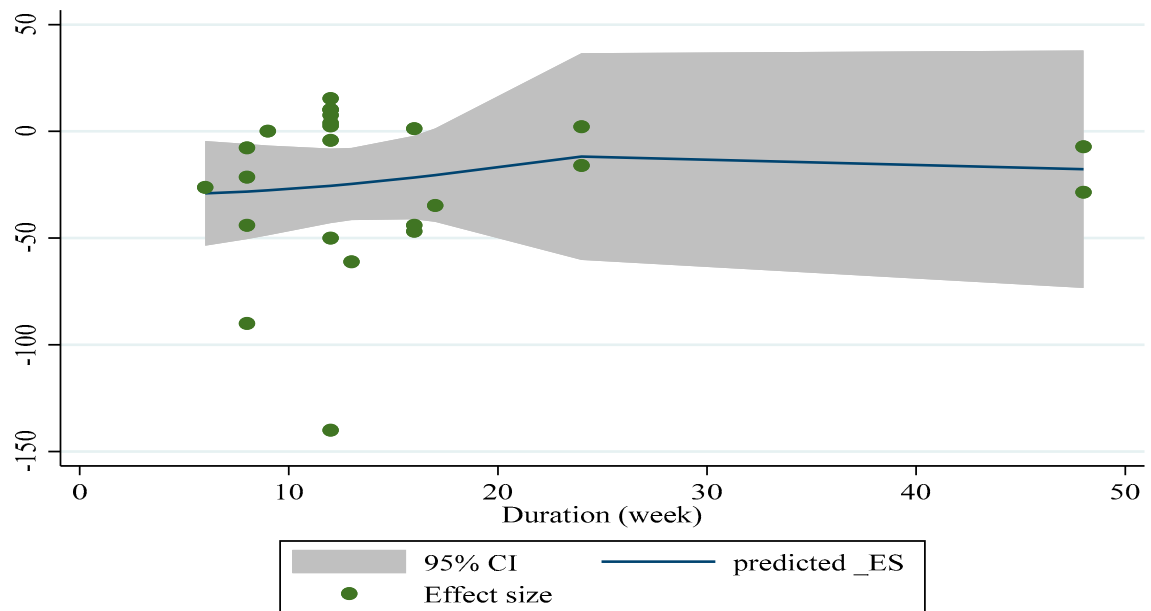

Supplementary Figure S5. *Cont.*

(C)

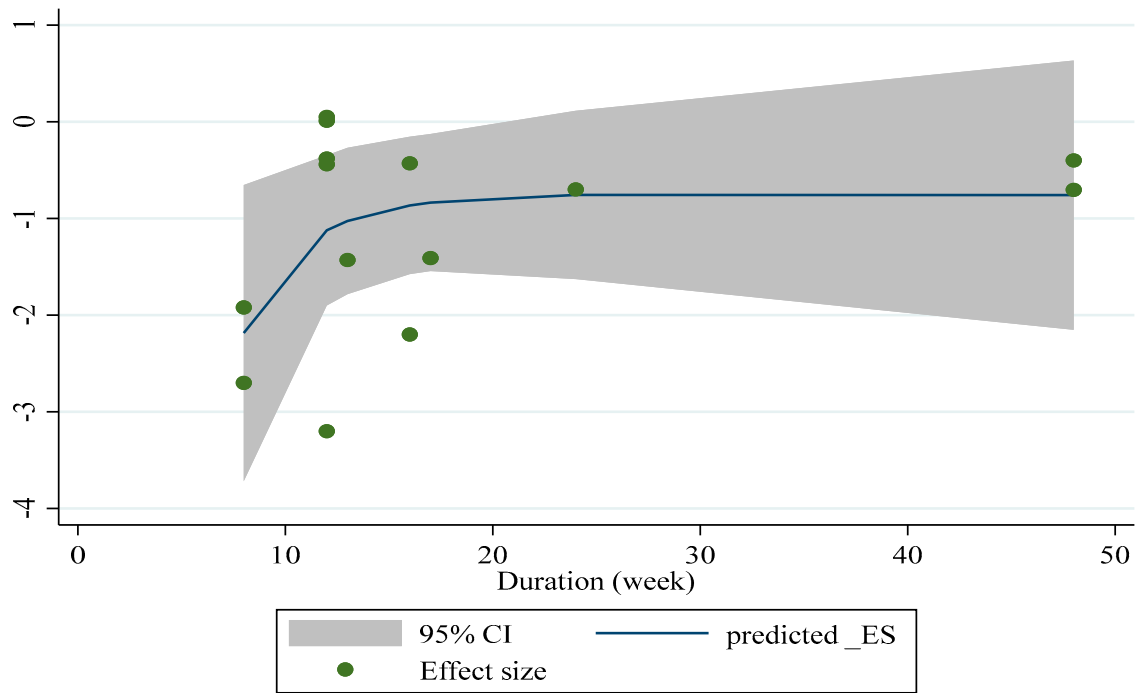

(D)

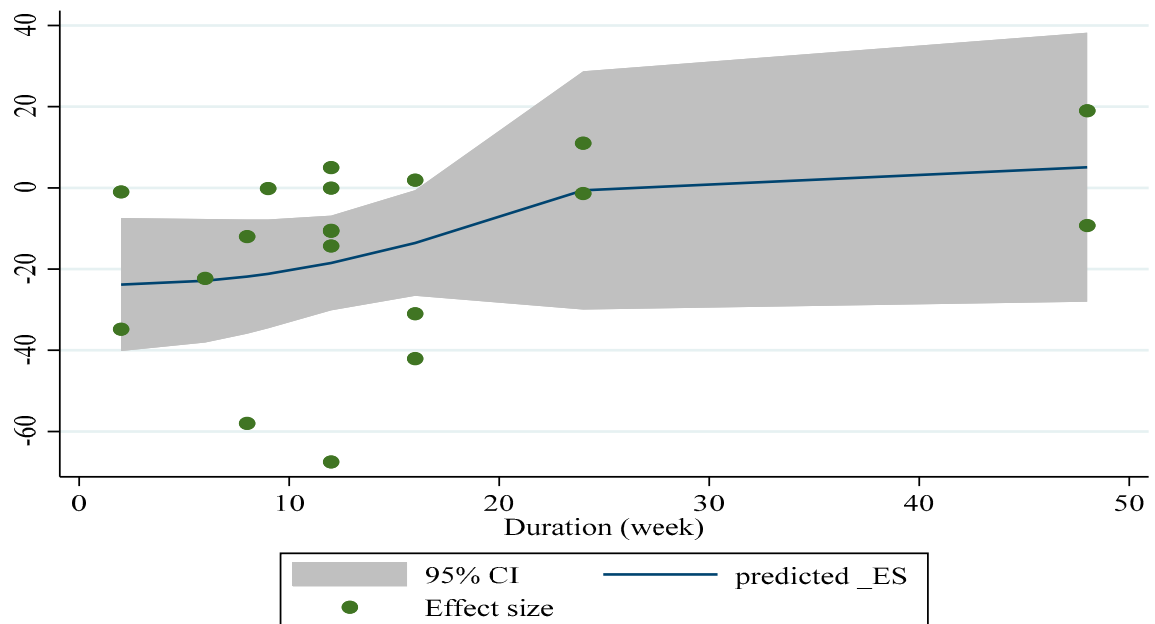

Supplementary Figure S5. *Cont.*

(E)

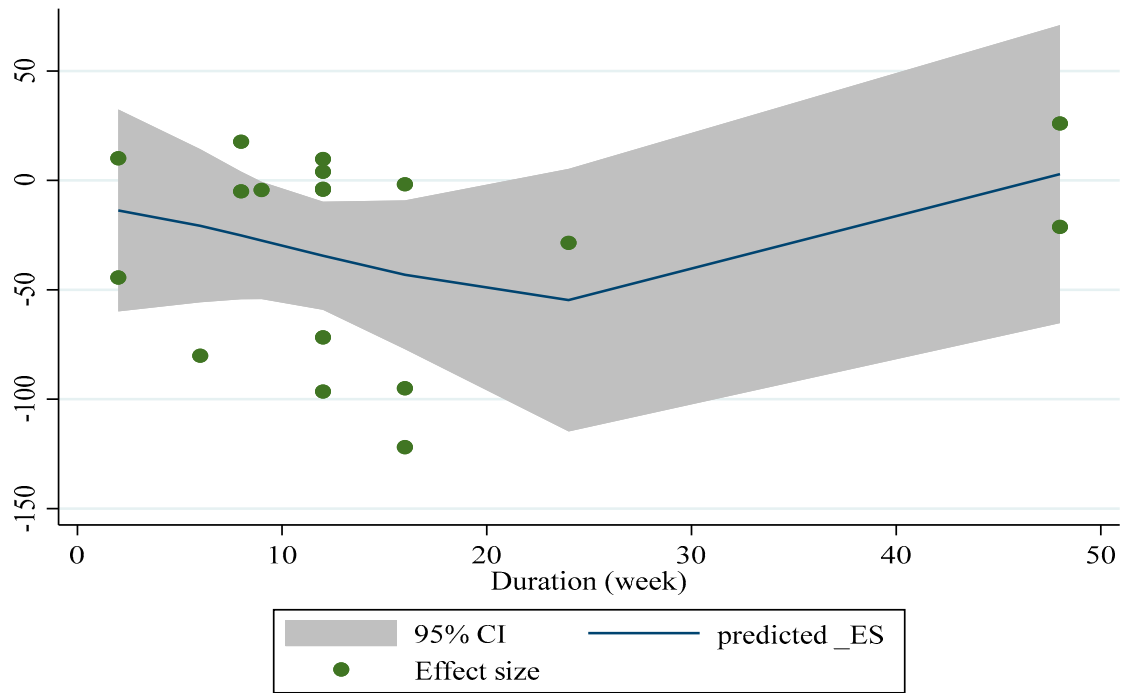

(F)

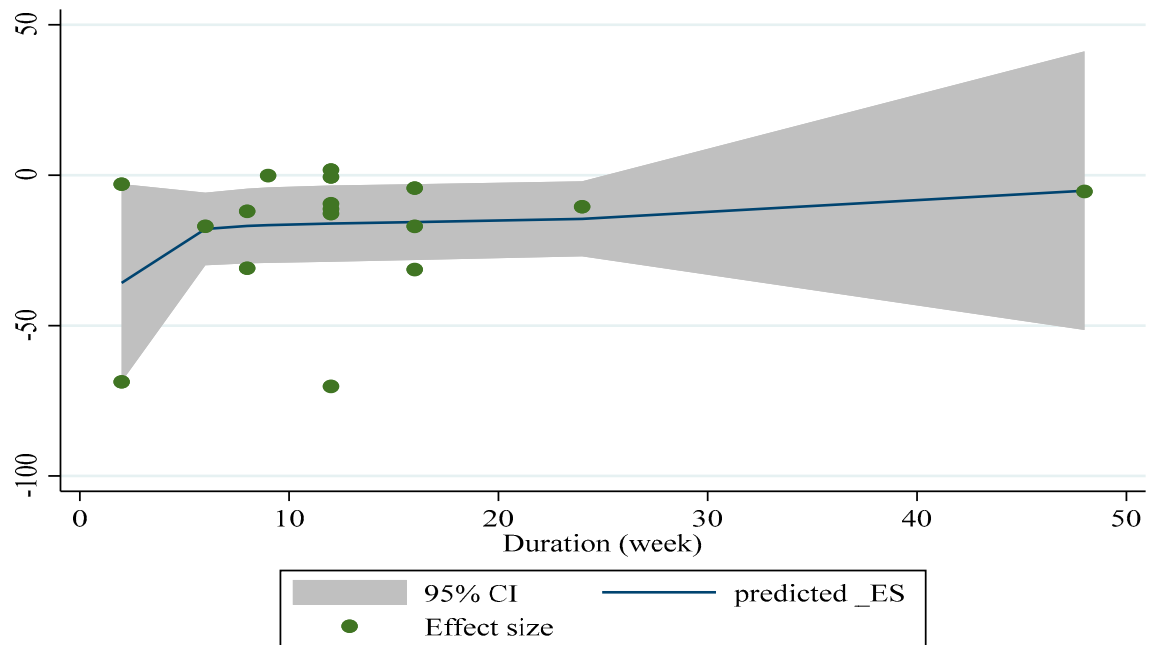

Supplementary Figure S5. *Cont.*

(G)

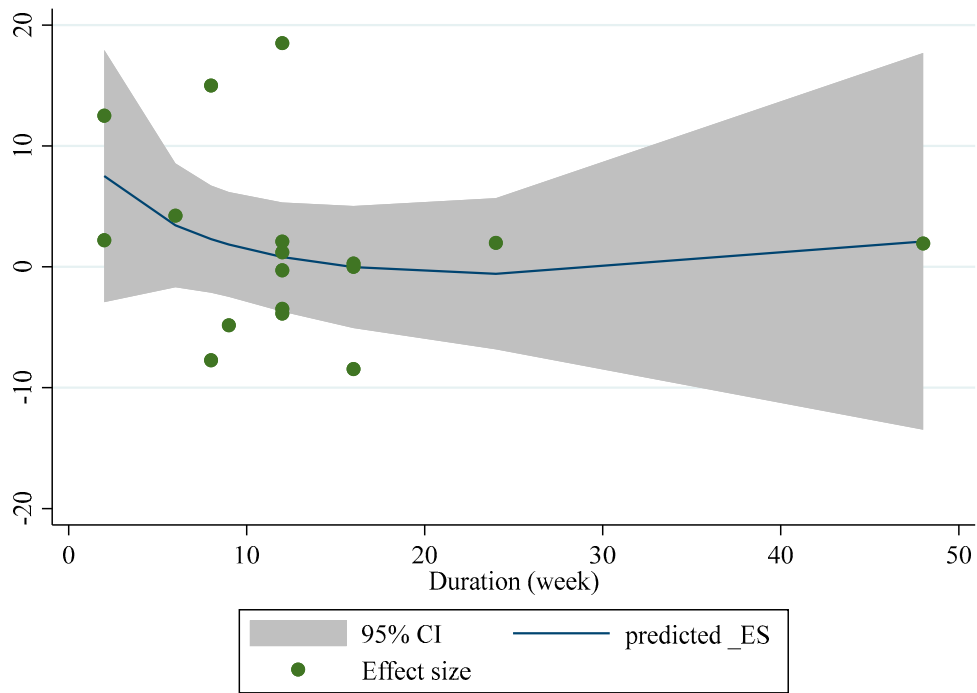

**Supplementary Figure S5.** Linear association between duration (week) of the supplementation with silymarin and absolute mean differences in **A)** BMI ( $\text{kg/m}^2$ ), **B)** FBG (mg/dL), **C)** HbA1c (%), **D)** TG (mg/dL), **E)** TC (mg/dL), **F)** LDL (mg/dL), and **G)** HDL (mg/dL).
